# Supplementary material
Source: PubMed Central journal article supplement (PMC6536337)
Supplement: NIHMS1515805-supplement-1.pdf [file NIHMS1515805-supplement-1.pdf]

Supplementary Table 3: Stratified analysis of association of SNAP<sup>a</sup> participation with self-reported frequency of consumption of selected food and beverage items for adult respondents with incomes below 130% of the Federal Poverty Line by presence or absence of a small grocery store within ½ mile. Cross-sectional data collected from four New Jersey cities in 2009-10 and 2014.

| Food and beverage items  | SNAP Participation <sup>b</sup>                                      |         |                                                                      |         | Interaction <sup>c</sup>                                             |         |
|--------------------------|----------------------------------------------------------------------|---------|----------------------------------------------------------------------|---------|----------------------------------------------------------------------|---------|
|                          | Small Grocery Absent<br>(n=590)                                      |         | Small Grocery Present<br>(n=393)                                     |         | (n=983)                                                              |         |
|                          | proportional difference (e <sup>b</sup> )<br>(95% CI) <sup>d,e</sup> | p-value | proportional difference (e <sup>b</sup> )<br>(95% CI) <sup>d,e</sup> | p-value | proportional difference (e <sup>b</sup> )<br>(95% CI) <sup>d,e</sup> | p-value |
| Fruit - all              | 0.83<br>(0.67, 1.03)                                                 | 0.09    | 0.93<br>(0.73, 1.20)                                                 | 0.59    | 1.22<br>(0.90, 1.66)                                                 | 0.20    |
| Vegetables - all         | 0.94<br>(0.82, 1.08)                                                 | 0.36    | 0.99<br>(0.85, 1.15)                                                 | 0.89    | 1.00<br>(0.82, 1.22)                                                 | 0.98    |
| Salad                    | 0.90<br>(0.72, 1.13)                                                 | 0.35    | 0.92<br>(0.70, 1.22)                                                 | 0.57    | 1.00<br>(0.72, 1.4)                                                  | 0.99    |
| SSB <sup>†</sup> - Total | 1.13<br>(0.90, 1.42)                                                 | 0.29    | 1.46<br>(1.09, 1.96)                                                 | 0.01    | 1.24<br>(0.89, 1.73)                                                 | 0.21    |
| Soda                     | 0.91<br>(0.64, 1.29)                                                 | 0.60    | 1.47<br>(0.97, 2.23)                                                 | 0.07    | 1.38<br>(0.85, 2.24)                                                 | 0.19    |
| Fruit                    | 1.28                                                                 | 0.07    | 1.42                                                                 | 0.05    | 1.08                                                                 | 0.72    |

|        |              |  |              |  |              |  |
|--------|--------------|--|--------------|--|--------------|--|
| Drinks | (0.98, 1.68) |  | (1.00, 2.02) |  | (0.71, 1.63) |  |
|--------|--------------|--|--------------|--|--------------|--|

<sup>a</sup> SNAP= Supplemental Nutrition Assistance Program

<sup>b</sup> Association of SNAP participation and reported frequency of consumption stratified by presence or absence of a small grocery store within ½ mile, using gamma regression adjusting for age, sex, race/ethnicity, education, city of residence, panel, WIC participation, and income

<sup>c</sup> Independent model including interaction between SNAP participation and small grocery presence, also controlling for age, sex, race/ethnicity, education, city of residence, panel, WIC participation, and income

<sup>d</sup>  $e^b$  = antilogarithm of regression coefficient, represents the proportional differences in the outcome associated with a 1-unit increase in the independent variable

<sup>e</sup> 95% CI=95% Confidence Interval

<sup>f</sup> SSB= Sugar sweetened beverage

Supplementary Table 4: Stratified analysis of association of SNAP<sup>a</sup> participation with self-reported frequency of consumption of selected food and beverage items for adult respondents with incomes below 130% of the Federal Poverty Line by presence or absence of a supermarket within ½ mile.

Cross-sectional data collected from four New Jersey cities in 2009-10 and 2014.

| Food and beverage items  | SNAP Participation <sup>b</sup>                                      |         |                                                                      |         | Interaction <sup>c</sup>                                             |         |
|--------------------------|----------------------------------------------------------------------|---------|----------------------------------------------------------------------|---------|----------------------------------------------------------------------|---------|
|                          | Supermarket Absent<br>(n=647)                                        |         | Supermarket Present<br>(n=336)                                       |         | (n=983)                                                              |         |
|                          | proportional difference (e <sup>b</sup> )<br>(95% CI) <sup>d,e</sup> | p-value | proportional difference (e <sup>b</sup> )<br>(95% CI) <sup>d,e</sup> | p-value | proportional difference (e <sup>b</sup> )<br>(95% CI) <sup>d,e</sup> | p-value |
| Fruit - all              | 0.80<br>(0.65, 0.98)                                                 | 0.03    | 1.07<br>(0.83, 1.37)                                                 | 0.61    | 1.41<br>(1.04, 1.91)                                                 | 0.03    |
| Vegetables - all         | 0.99<br>(0.86, 1.13)                                                 | 0.84    | 0.89<br>(0.76, 1.04)                                                 | 0.15    | 0.97<br>(0.79, 1.19)                                                 | 0.80    |
| Salad                    | 0.99<br>(0.79, 1.24)                                                 | 0.95    | 0.77<br>(0.59, 1.02)                                                 | 0.06    | 0.91<br>(0.64, 1.28)                                                 | 0.58    |
| SSB <sup>f</sup> - Total | 1.13<br>(0.92, 1.40)                                                 | 0.25    | 1.42<br>(1.05, 1.90)                                                 | 0.02    | 1.13<br>(0.81, 1.59)                                                 | 0.47    |
| Soda                     | 0.95<br>(0.68, 1.31)                                                 | 0.74    | 1.24<br>(0.79, 1.93)                                                 | 0.35    | 1.33<br>(0.82, 2.14)                                                 | 0.25    |
| Fruit                    | 1.25                                                                 | 0.09    | 1.45                                                                 | 0.05    | 1.01                                                                 | 0.95    |

|        |              |  |              |  |              |  |
|--------|--------------|--|--------------|--|--------------|--|
| Drinks | (0.97, 1.61) |  | (1.00, 2.08) |  | (0.66, 1.55) |  |
|--------|--------------|--|--------------|--|--------------|--|

<sup>a</sup> SNAP= Supplemental Nutrition Assistance Program

<sup>b</sup> Association of SNAP participation and reported frequency of consumption stratified by presence or absence of a supermarket within ½ mile, using gamma regression adjusting for age, sex, race/ethnicity, education, city of residence, panel, WIC participation, and income

<sup>c</sup> Independent model including interaction between SNAP participation and supermarket presence, also controlling for age, sex, race/ethnicity, education, city of residence, panel, WIC participation, and income

<sup>d</sup>  $e^b$  = antilogarithm of regression coefficient, represents the proportional differences in the outcome associated with a 1-unit increase in the independent variable

<sup>e</sup> 95% CI=95% Confidence Interval

<sup>e</sup> SSB= Sugar sweetened beverage

Supplementary Table 5: Stratified analysis of association of SNAP<sup>a</sup> participation with self-reported frequency of consumption of selected food and beverage items for adult respondents with incomes below 130% of the Federal Poverty Line by presence or absence of a convenience store within ¼ mile. Cross-sectional data collected from four New Jersey cities in 2009-10 and 2014.

| Food and beverage items  | SNAP Participation <sup>b</sup>                                      |         |                                                                      |         | Interaction <sup>c</sup>                                             |         |
|--------------------------|----------------------------------------------------------------------|---------|----------------------------------------------------------------------|---------|----------------------------------------------------------------------|---------|
|                          | Convenience Store Absent<br>(n=188)                                  |         | Convenience Store Present<br>(n=814)                                 |         | (n=983)                                                              |         |
|                          | proportional difference (e <sup>b</sup> )<br>(95% CI) <sup>d,e</sup> | p-value | proportional difference (e <sup>b</sup> )<br>(95% CI) <sup>d,e</sup> | p-value | proportional difference (e <sup>b</sup> )<br>(95% CI) <sup>d,e</sup> | p-value |
| Fruit - all              | 1.08<br>(0.93, 1.27)                                                 | 0.32    | 1.04<br>(0.83, 1.31)                                                 | 0.73    | 1.07<br>(0.73, 1.59)                                                 | 0.72    |
| Vegetables - all         | 1.05<br>(0.95, 1.16)                                                 | 0.32    | 1.03<br>(0.90, 1.19)                                                 | 0.66    | 1.03<br>(0.79, 1.34)                                                 | 0.82    |
| Salad                    | 1.12<br>(0.95, 1.33)                                                 | 0.17    | 1.13<br>(0.91, 1.41)                                                 | 0.28    | 1.18<br>(0.76, 1.83)                                                 | 0.47    |
| SSB <sup>†</sup> - Total | 0.79<br>(0.66, 0.95)                                                 | 0.01    | 0.96<br>(0.73, 1.27)                                                 | 0.78    | 0.88<br>(0.57, 1.35)                                                 | 0.56    |
| Soda                     | 0.68<br>(0.51, 0.90)                                                 | 0.01    | 0.98<br>(0.66, 1.48)                                                 | 0.94    | 0.73<br>(0.39, 1.33)                                                 | 0.30    |
| Fruit                    | 0.91                                                                 | 0.45    | 0.91                                                                 | 0.58    | 1.00                                                                 | 0.98    |

|        |              |  |              |  |              |  |
|--------|--------------|--|--------------|--|--------------|--|
| Drinks | (0.73, 1.15) |  | (0.65, 1.28) |  | (0.58, 1.70) |  |
|--------|--------------|--|--------------|--|--------------|--|

<sup>a</sup> SNAP= Supplemental Nutrition Assistance Program

<sup>b</sup> Association of SNAP participation and reported frequency of consumption stratified by presence or absence of a convenience store within ¼ mile, using gamma regression adjusting for age, sex, race/ethnicity, education, city of residence, panel, WIC participation, and income

<sup>c</sup> Independent model including interaction between SNAP participation and convenience store presence, also controlling for age, sex, race/ethnicity, education, city of residence, panel, WIC participation, and income

<sup>d</sup>  $e^b$  = antilogarithm of regression coefficient, represents the proportional differences in the outcome associated with a 1-unit increase in the independent variable

<sup>e</sup> 95% CI=95% Confidence Interval

<sup>f</sup> SSB= Sugar sweetened beverage

Supplementary Table 6: Stratified analysis of association of SNAP<sup>a</sup> participation with reported frequency of consumption of selected food and beverage items for adult respondents with incomes below 130% of the Federal Poverty Line by presence or absence of a limited service restaurant within ¼ mile. Cross-sectional data collected from four New Jersey cities in 2009-10 and 2014.

| Food and beverage items  | SNAP Participation <sup>b</sup>                                      |         |                                                                      |         | Interaction <sup>c</sup>                                             |         |
|--------------------------|----------------------------------------------------------------------|---------|----------------------------------------------------------------------|---------|----------------------------------------------------------------------|---------|
|                          | LSR <sup>d</sup> Absent<br>(n=310)                                   |         | LSR Present<br>(n=673)                                               |         | (n=983)                                                              |         |
|                          | proportional difference (e <sup>b</sup> )<br>(95% CI) <sup>e,f</sup> | p-value | proportional difference (e <sup>b</sup> )<br>(95% CI) <sup>e,f</sup> | p-value | proportional difference (e <sup>b</sup> )<br>(95% CI) <sup>e,f</sup> | p-value |
| Fruit - all              | 1.14<br>(0.84, 1.54)                                                 | 0.41    | 0.83<br>(0.69, 1.01)                                                 | 0.06    | 0.78<br>(0.56, 1.08)                                                 | 0.14    |
| Vegetables - all         | 1.06<br>(0.88, 1.27)                                                 | 0.53    | 0.94<br>(0.82, 1.06)                                                 | 0.31    | 0.90<br>(0.73, 1.11)                                                 | 0.32    |
| Salad                    | 1.10<br>(0.82, 1.46)                                                 | 0.52    | 0.86<br>(0.69, 1.07)                                                 | 0.18    | 0.83<br>(0.59, 1.19)                                                 | 0.32    |
| SSB <sup>g</sup> - Total | 1.07<br>(0.78, 1.47)                                                 | 0.67    | 1.27<br>(1.02, 1.58)                                                 | 0.03    | 1.31<br>(0.92, 1.87)                                                 | 0.14    |
| Soda                     | 0.84<br>(0.53, 1.33)                                                 | 0.45    | 1.16<br>(0.84, 1.60)                                                 | 0.36    | 1.59<br>(0.96, 2.63)                                                 | 0.07    |
| Fruit Drinks             | 1.27<br>(0.88, 1.85)                                                 | 0.21    | 1.28<br>(0.97, 1.69)                                                 | 0.08    | 1.05<br>(0.74, 1.48)                                                 | 0.82    |

---

<sup>a</sup> SNAP= Supplemental Nutrition Assistance Program

<sup>b</sup> Association of SNAP participation and reported frequency of consumption stratified by presence or absence of a limited service restaurant within ¼ mile, using gamma regression adjusting for age, sex, race/ethnicity, education, city of residence, panel, WIC participation, and income

<sup>c</sup> Independent model including interaction between SNAP participation and limited service restaurant presence, also controlling for age, sex, race/ethnicity, education, city of residence, panel, WIC participation, and income

<sup>d</sup> LSR=Limited service restaurant

<sup>e</sup>  $e^b$  = antilogarithm of regression coefficient, represents the proportional differences in the outcome associated with a 1-unit increase in the independent variable

<sup>f</sup> 95% CI=95% Confidence Interval

<sup>g</sup> SSB= Sugar sweetened beverage
